# Supplementary material for: Niclosamide–Clay Intercalate Coated with Nonionic Polymer for Enhanced Bioavailability toward COVID-19 Treatment
Source: PubMed Central journal article supplement (PMC8036780; doi:10.3390/polym13071044), 2021-03-26
Supplement: polymers-13-01044-s001.pdf [file polymers-13-01044-s001.pdf]

Supplementary Material

# Niclosamide–Clay Intercalate Coated with Nonionic Polymer for Enhanced Bioavailability toward COVID-19 Treatment

Seungjin Yu <sup>1,2,†</sup>, Huiyan Piao <sup>2,†</sup>, N. Sanoj Rejinold <sup>2</sup>, Geunwoo Jin <sup>3</sup>, Goeun Choi <sup>2,4,5,\*</sup> and Jin-Ho Choy <sup>2,6,7,\*</sup>

<sup>1</sup> Department of Chemistry, College of Science and Technology, Dankook University, Cheonan 31116, Korea; 32182808@dankook.ac.kr

<sup>2</sup> Intelligent Nanohybrid Materials Laboratory (INML), Institute of Tissue Regeneration Engineering (ITREN), Dankook University, Cheonan 31116, Korea; 12192032@dankook.ac.kr (H.P.), sanojrejinold@dankook.ac.kr (N.S.R.)

<sup>3</sup> R&D Center, CnPharm Co., LTD., Seoul 03759, Korea; geunwoo.jin@cnpharm.co.kr

<sup>4</sup> College of Science and Technology, Dankook University, Cheonan 31116, Korea

<sup>5</sup> Department of Nanobiomedical Science and BK21 PLUS NBM Global Research Center for Regenerative Medicine, Dankook University, Cheonan 31116, Korea

<sup>6</sup> Department of Pre-medical Course, College of Medicine, Dankook University, Cheonan 31116, Korea

<sup>7</sup> Tokyo Tech World Research Hub Initiative (WRHI), Institute of Innovative Research, Tokyo Institute of Technology, Yokohama 226-8503, Japan

\* Correspondence: goeun.choi@dankook.ac.kr (G.C.); jhchoy@dankook.ac.kr (J.-H.C.)

† These authors contributed equally to this work.

**Table S1.** Rate constants and  $r^2$  coefficients obtained from fitting analyses based on several kinetic equations.

| Kinetic Equation                                                             | NIC(1.0)-MMT | NIC(1.0)-MMT-E | NIC(1.3)-MMT-E |
|------------------------------------------------------------------------------|--------------|----------------|----------------|
| <b>First order : <math>\ln(C_t/C_0) = -k_d t</math></b>                      |              |                |                |
| $k_d$                                                                        | 0.02928      | 0.2889         | 0.2337         |
| $r^2$                                                                        | 0.9310       | 0.9806         | 0.3789         |
| <b>Parabolic diffusion : <math>(1 - C_t/C_0)/t = k_d t^{-0.5} + a</math></b> |              |                |                |
| $k_d$                                                                        | 1.0633       | 0.4478         | 1.8991         |
| $a$                                                                          | -0.2984      | -0.0349        | -0.6347        |
| $r^2$                                                                        | 0.9531       | 0.9896         | 0.9485         |
| <b>Freundlich : <math>\log(1 - C_t/C_0) = \log(k_d) + a \log t</math></b>    |              |                |                |
| $k_d$                                                                        | 0.8113       | 0.6670         | 1.0478         |
| $a$                                                                          | 0.2087       | 0.4305         | 0.0483         |
| $r^2$                                                                        | 0.9883       | 0.9950         | 0.6638         |
| <b>Elovich : <math>1 - C_t/C_0 = a \ln t + b</math></b>                      |              |                |                |
| $k_d$                                                                        | 0.1368       | 0.1988         | 0.0420         |
| $a$                                                                          | 0.6393       | 0.4587         | 0.9010         |
| $r^2$                                                                        | 0.9839       | 0.9676         | 0.6789         |

† These authors contributed equally to this work.

$C_t$  = the amount of guest in the NIC at  $t$  min;  $C_0$  = the amount of guest in the NIC at 0 min;  $k_d$  = the rate constant of release,  $a$ ,  $b$ ,  $n$  = constant.

In order to understand the release mechanism of NIC from the NIC loaded MMT hybrids, the observed release profiles were fitted to four kinetic models as plotted in **Figure S1** and the obtained rate constants ( $k_d$ ) and  $r^2$  values were summarized in **Table S1**. [37,39] Considering the  $r^2$  value, the release curves of NIC from NIC(1.0)-MMT-E nanohybrids were well fitted with all the four kinetic models, i.e., First-order (0.9806), Parabolic diffusion (0.9896), modified Freundlich (0.9950), and Elovich model (0.9676) (**Table S1**). However, the results showed that the release profiles were best fitted to Parabolic diffusion and Freundlich models. Moreover, from the parabolic diffusion model, the release rate coefficients for NIC(1.0)-MMT and NIC(1.3)-MMT-E hybrids were determined to be 0.9531 and 0.9485, respectively, which were less than NIC(1.0)-MMT-E

hybrid (0.9896). The calculation with modified Freundlich model revealed that the release coefficients for NIC(1.0)-MMT (0.9883) and NIC(1.3)-MMT-E (0.6638) hybrids were calculated to be less than that for NIC(1.0)-MMT-E (0.9950) hybrid. All the calculation results suggested strongly that the release of the intercalated NIC from NIC(1.0)-MMT-E hybrid was a kind of diffusion-controlled processes or heterogeneous diffusion processes.

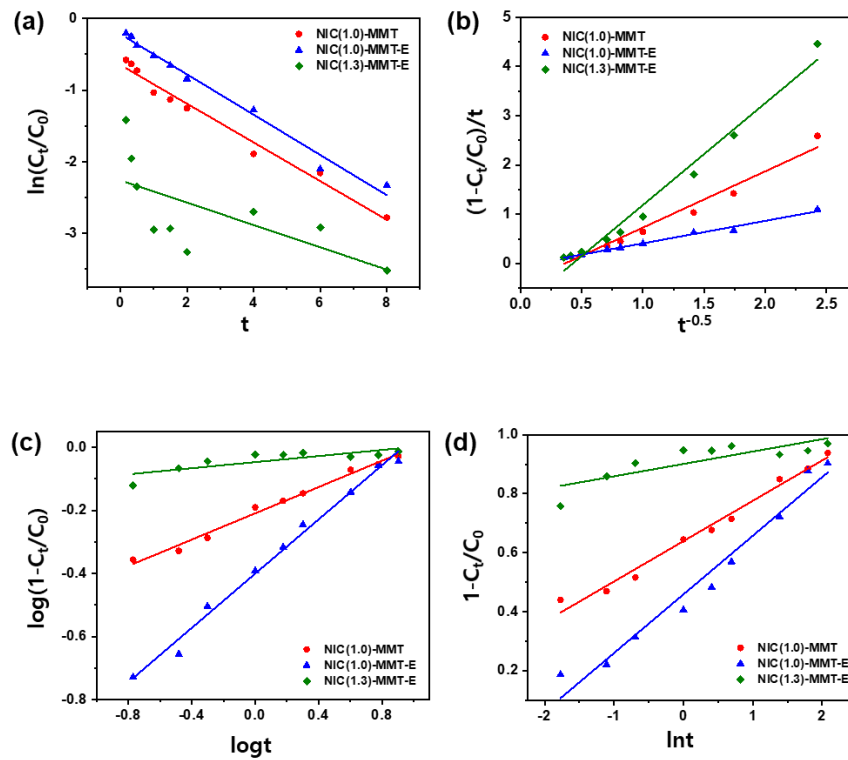

**Figure S1.** Plots of kinetic equation of (a) First-order kinetic model, (b) Parabolic diffusion model, (c) modified Freundlich model, and (d) Elovich model for the release of NIC from NIC(1.0)-MMT (red), NIC(1.0)-MMT-E (blue) and NIC(1.3)-MMT-E (green) hybrids.
